# Supplementary material for: The caries-arresting effect of incorporating functionalized tricalcium phosphate into fluoride varnish applied following application of silver nitrate solution in preschool children: study protocol for a randomized, double-blind clinical trial
Source: Springer Nature journal article supplement (doi:10.1186/s13063-018-2741-1), 2018-07-04
Supplement: MOESM3 [file 15908332]

Additional File 3. WHO Trial Registration Data Set

| <b>Data category</b>                          | <b>Information</b>                                                                                                                                                                                                                                                                      |
|-----------------------------------------------|-----------------------------------------------------------------------------------------------------------------------------------------------------------------------------------------------------------------------------------------------------------------------------------------|
| Primary registry and trial identifying number | ClinicalTrials.gov<br>NCT03423797                                                                                                                                                                                                                                                       |
| Date of registration in primary registry      | 31 <sup>st</sup> Jan 2018                                                                                                                                                                                                                                                               |
| Secondary identifying numbers                 | UW 17-176                                                                                                                                                                                                                                                                               |
| Source(s) of monetary or material support     | Not applicable                                                                                                                                                                                                                                                                          |
| Primary sponsor                               | Not applicable                                                                                                                                                                                                                                                                          |
| Contact for public queries                    | Chu Chun Hung<br>chchu@hku.hku; (+852) 2859 0246                                                                                                                                                                                                                                        |
| Contact for scientific queries                | Chu Chun Hung<br>chchu@hku.hku; (+852) 2859 0246                                                                                                                                                                                                                                        |
| Public title                                  | The Caries-arresting Effect of Incorporating fTCP to NaF Varnish Applied Following AgNO <sub>3</sub> in Preschool Children                                                                                                                                                              |
| Scientific title                              | Effectiveness of Biannual Application of Silver Nitrate Solution Followed by Sodium Fluoride Varnish With or Without Functionalized Tricalcium Phosphate in Arresting Caries in Preschool Children                                                                                      |
| Countries of recruitment                      | Hong Kong SAR, China                                                                                                                                                                                                                                                                    |
| Health condition(s) or problem(s) studied     | Dental Caries                                                                                                                                                                                                                                                                           |
| Intervention(s)                               | Active Comparator: 25% AgNO <sub>3</sub> solution followed by 5% NaF;<br>Experimental: 25% AgNO <sub>3</sub> solution followed by 5% NaF with fTCP.                                                                                                                                     |
| Key inclusion and exclusion criteria          | Inclusion criteria: Children have at least one tooth with cavitated dentine carious lesion;<br>Exclusion criteria: Children have severe forms of dental hypoplasia, under dental treatment or wearing orthodontic devices, have major systemic illness, and are on long-term medication |
| Study type                                    | Interventional<br>Allocation: randomized<br>Intervention model: parallel assignment<br>Masking: double blind Primary purpose: treatment<br>Phase III                                                                                                                                    |
| Date of first enrolment                       | 14 Sep 2017                                                                                                                                                                                                                                                                             |
| Target sample size                            | 408 children                                                                                                                                                                                                                                                                            |
| Recruitment status                            | Recruiting                                                                                                                                                                                                                                                                              |

|                        |                                                                                                                                                                                                         |
|------------------------|---------------------------------------------------------------------------------------------------------------------------------------------------------------------------------------------------------|
| Primary outcome(s)     | The effectiveness of adjunctive application of 25% AgNO <sub>3</sub> solution and 5% NaF varnish with or without fTCP in arresting dentine caries of primary teeth in preschool children over 30 months |
| Key secondary outcomes | Compare the effectiveness of 5% NaF varnish with fTCP and that of 5% NaF without fTCP in preventing dental caries in preschool children over 30 months                                                  |
